# Supplementary material for: Lipopolysaccharide Binding Protein and Bactericidal/Permeability-Increasing Protein as Biomarkers for Invasive Pulmonary Aspergillosis
Source: PubMed Central journal article supplement (PMC7712449; doi:10.3390/jof6040304), 2020-11-20
Supplement: jof-06-00304-s001.pdf [file jof-06-00304-s001.pdf]

# Supplementary Materials

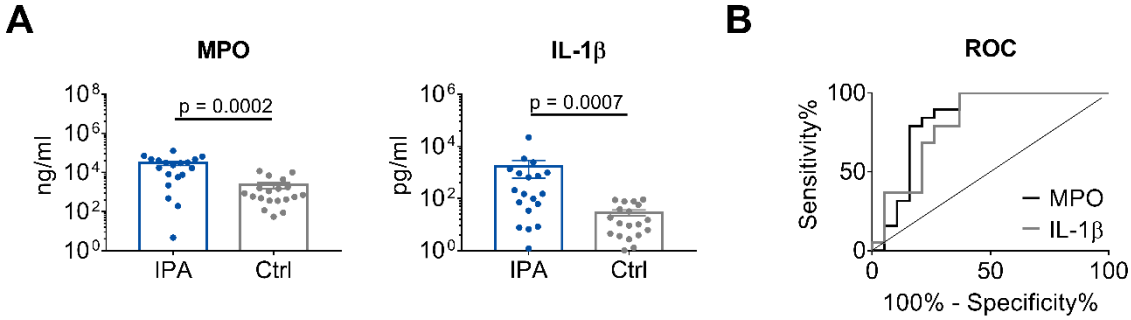

**Figure S1.** Distinction of IPA and Ctrl patients by MPO and IL-1β. **(A)** Levels of MPO and IL-1β in the BALF of 19 patients with IPA compared with 19 age- and sex-matched Ctrl patients. Data are presented as mean ± SEM. *P*-values were determined by Mann-Whitney *U* test. **(B)** Area under the curve (AUC) as determined by ROC curve analysis for MPO and IL-1β values depicted in (A) for IPA and Ctrl patients.

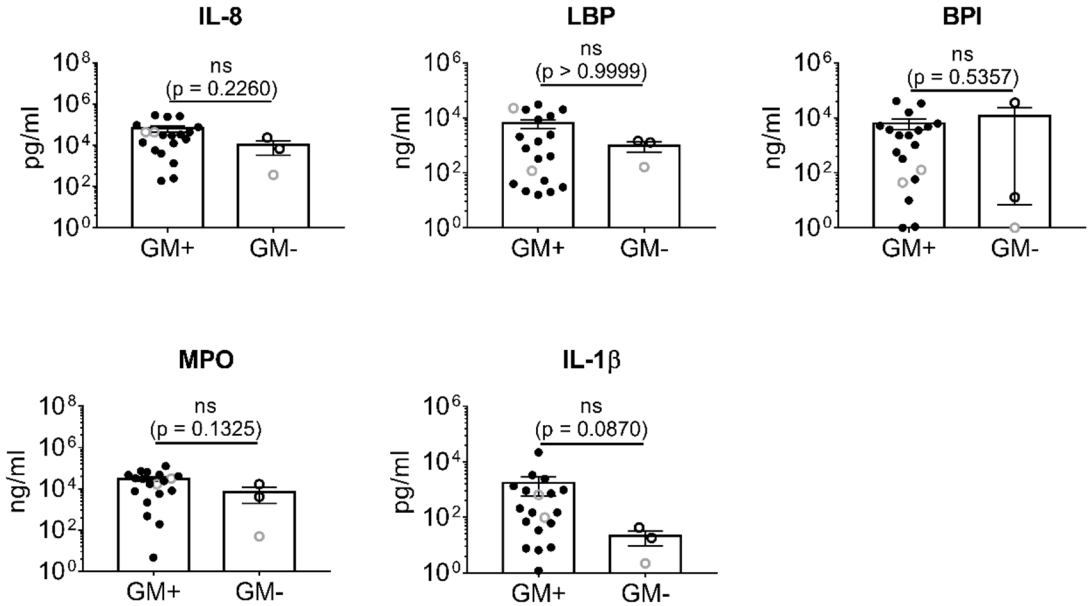

**Figure S2.** Comparison of IL-8, LBP, BPI, MPO and IL-1β. Comparison of included patients (GM positive in serum and BALF, GM+), and patients not meeting inclusion criteria because serum GM was beneath the cut-off, despite typical radiological findings (GM positive in serum, but negative in BALF, GM-). Patients with Mucorales co-infection are marked in grey, non-filled symbols. Data are presented as mean ± SEM. Mann-Whitney *U* test was used for the statistical analysis, non-significant (ns) results are marked.

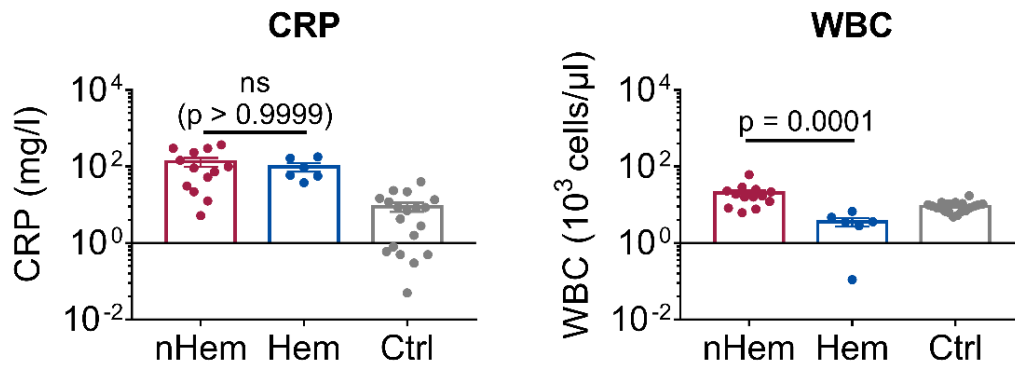

**Figure S3.** Comparison of tested biomarkers in the subgroup of nHem and Hem patients. CRP in serum and WBC are compared between nHem ( $n = 13$ ), Hem ( $n = 6$ ) and Ctrl group ( $n = 19$ ). Data are presented as mean  $\pm$  SEM and  $p$ -values were determined by Mann-Whitney  $U$  test, non-significant (ns) results are marked.

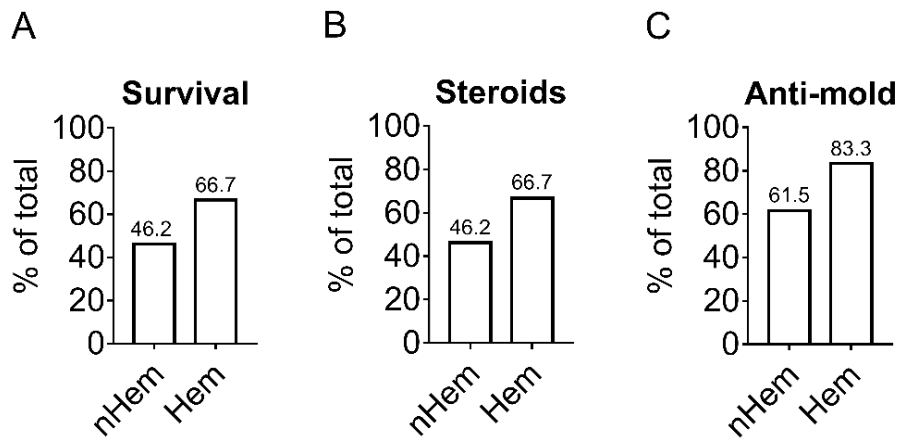

**Figure S4.** Comparison of clinical parameters in the subgroup of nHem and Hem patients. Survival (A), use of systemic steroids at the time point when BALF was obtained (B) and anti-mold therapy for more than 2 days prior to the performance of the bronchoalveolar lavage (C) are depicted.

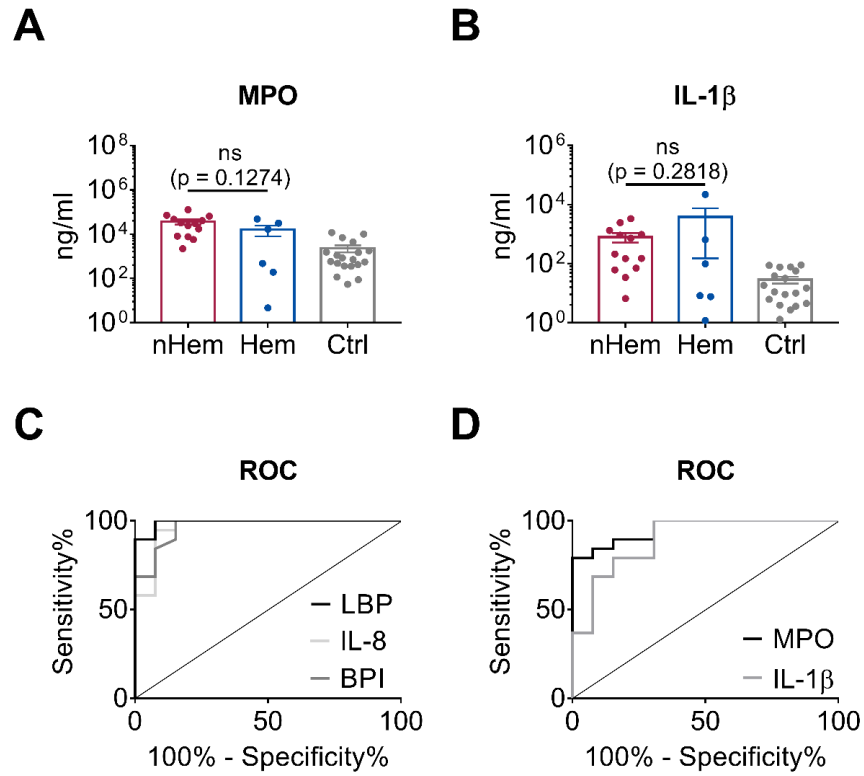

**Figure S5.** Discrimination between nHem and Hem patients with IPA and Ctrl patients regarding MPO and IL-1 $\beta$ . (A, B) Comparison of MPO and IL-1 $\beta$  levels in the BALF of nHem ( $n = 13$ ) and Hem patients with IPA ( $n = 6$ ) as opposed to the Ctrl patients ( $n = 19$ ). Data are presented as mean  $\pm$  SEM. Mann-Whitney U test was used for the statistical analysis, non-significant (ns) results are marked. (C, D) ROC for IL-8, LBP, BPI as well as MPO and IL-1 $\beta$  in BALF for nHem versus Ctrl patients.

**Table S1.** Characteristics of control patients.

| <b>Patient Characteristics</b>                                                |                                     |                |
|-------------------------------------------------------------------------------|-------------------------------------|----------------|
| Sex                                                                           | Female                              | 5 (26.3%)      |
|                                                                               | Male                                | 14 (73.7%)     |
| Age (in years)                                                                | Median (Range)                      | 57 (28–81)     |
| Idiopathic interstitial pneumonia                                             | Total                               | 7 (36.8%)      |
|                                                                               | Usual interstitial pneumonia        | 3 (15.8%)      |
|                                                                               | Non-specific interstitial pneumonia | 2 (10.5%)      |
|                                                                               | Desquamative interstitial pneumonia | 1 (5.3%)       |
|                                                                               | Cryptogenic organizing pneumonia    | 1 (5.3%)       |
| Hypersensitivity pneumonitis                                                  |                                     | 6 (31.6%)      |
| Sarcoid                                                                       |                                     | 3 (15.8%)      |
| ILD unclassified                                                              |                                     | 3 (15.8%)      |
| Mortality                                                                     |                                     | none           |
| Systemic treatment with corticosteroids                                       |                                     | 8 (42.1%)      |
| Mold-active antifungal prophylaxis/treatment ( $\geq 2$ days before sampling) |                                     | none           |
| <b>Laboratory Results</b>                                                     |                                     |                |
| GM in serum                                                                   | Mean $\pm$ SD                       | not analyzed   |
| GM in BALF                                                                    | Mean $\pm$ SD                       | 0.2 $\pm$ 0.1  |
| WBC (1000/ $\mu$ L)                                                           | Mean $\pm$ SD                       | 9.1 $\pm$ 2.8  |
| CRP (mg/L)                                                                    | Mean $\pm$ SD                       | 8.9 $\pm$ 10.2 |
| Relevant bacterial pathogens in BALF                                          | PCR and/or culture                  | none           |
